# Supplementary material
Source: HighWire-hosted journal article supplement (https://www.annfammed.org/highwire/filestream/615/field_highwire_adjunct_files/0/Letourneau_Supp_App.pdf)
Supplement: Letourneau_Supp_App.pdf [file Letourneau_Supp_App.pdf]

Supplemental materials for:

Letourneau LM, Ritzo J, Shonk R, Eichler M, Sy S. Supporting physicians and practice teams in efforts to address the opioid epidemic. *Ann Fam Med.* 2019;17(Suppl\_1):S77-S81.

**Supplemental APPENDIX**

| <b>Tool</b>                                                       | <b>Brief Description</b>                                                                                                                                                                      | <b>URL</b>                                                          |
|-------------------------------------------------------------------|-----------------------------------------------------------------------------------------------------------------------------------------------------------------------------------------------|---------------------------------------------------------------------|
| <b>Quality Counts</b>                                             |                                                                                                                                                                                               |                                                                     |
| <b>Chronic Pain &amp; Controlled Medications Playbook</b>         | Toolkit that includes step-by-step guides, recommendations, and templates for practices in efforts to work with patients with chronic pain or those who are prescribed controlled medications | <a href="#">Chronic Pain &amp; Controlled Medications Playbook</a>  |
| <b>QC Learning Lab – Online Opioid-related Learning Modules</b>   | Set of 9 online learning modules related to management of chronic pain, safe opioid prescribing, compassionate tapering, and stigma                                                           | <a href="#">QC Learning Lab – opioid educational modules</a>        |
| <b>Snuggle ME Guidelines</b>                                      | Guidelines for health care organizations to improve care for mothers and infants affected by SUD                                                                                              | <a href="#">Snuggle ME Guidelines and related education</a>         |
| <b>Initiating MAT in Emergency Departments</b>                    | Educational webinar on initiating buprenorphine in Emergency Department setting                                                                                                               | <a href="#">Educational webinar on initiating MAT in ED setting</a> |
| <b>The Health Collaborative</b>                                   |                                                                                                                                                                                               |                                                                     |
| <b>Hamilton County Heroin Coalition Daily Surveillance Report</b> | A “community score card” reporting on daily measurement of ED visits for OUD, overdose occurrences, EMS runs, and “heat map”                                                                  | <a href="#">HCHC Daily Opioid &amp; OD Surveillance Report</a>      |
| <b>ED Flowchart for Treatment of Suspected Opioid OD</b>          | Developed by Hamilton County Commissioner’s Task Force; consensus adopted                                                                                                                     | <a href="#">ED Flowchart for Tx Suspected Opioid OD</a>             |
| <b>Mountain-Pacific Quality Health</b>                            |                                                                                                                                                                                               |                                                                     |
| <b>CDC Opioid Guidelines</b>                                      | Checklist for prescribing opioids in chronic pain                                                                                                                                             | <a href="#">Checklist for Prescribing Opioids in Chronic Pain</a>   |
| <b>The Prescription Opioid</b>                                    | Education to Beneficiaries                                                                                                                                                                    | <a href="#">Opioid Education for Beneficiaries</a>                  |
| <b>Montana Medicaid Opioid MME limits</b>                         | Provider notice for MME limit implementation                                                                                                                                                  | <a href="#">Provider Notice on Medicaid MME Limit</a>               |
| <b>Network for Regional Health Improvement Opioid Tools</b>       |                                                                                                                                                                                               |                                                                     |
| <b>NRHI HealthDoers Opioid Resource Bundle</b>                    | Collection of opioid-related tools and links from NRHI members and national organizations                                                                                                     | <a href="#">NRHI HealthDoers Opioid Resource Bundle</a>             |
